# Supplementary material for: Large Language Model–Based Responses to Patients’ In-Basket Messages
Source: PubMed Central journal article supplement (PMC11252893; doi:10.1001/jamanetworkopen.2024.22399), 2024-07-16
Supplement: jamanetwopen-e2422399-s001.pdf [file jamanetwopen-e2422399-s001.pdf]

## Supplemental Online Content

Small WR, Wiesenfeld B, Brandfield-Harvey B, et al. Large language model–based responses to patients' in-basket messages. *JAMA Netw Open*. 2024;7(7):e2422399. doi:10.1001/jamanetworkopen.2024.22399

**eAppendix 1.** Survey Design Flow Diagram

**eAppendix 2.** Subgroup Analyses Stratified First by HCP Type (Physician vs Nonphysician), Then by Patient Message Subcategory

**eAppendix 3.** Linear Mixed Models With Random and Fixed Effects to Explore the Extent to Which Reviewer Variance or That Attributed to Patient Message (General Medical Advice, Laboratory Results, Medication Refill Requests, Paperwork) and HCP (Physician, Nonphysician) Subgroups Affected Final Results for the Main 3 Survey Questions

**eAppendix 4.** Select Free-Text Comments From Each Questions When Other Was Chosen in the Branching Logic

**eAppendix 5.** Exploration of Intraclass Correlation by Subgroup

This supplemental material has been provided by the authors to give readers additional information about their work.

# eAppendix 1. Survey Design Flow Diagram

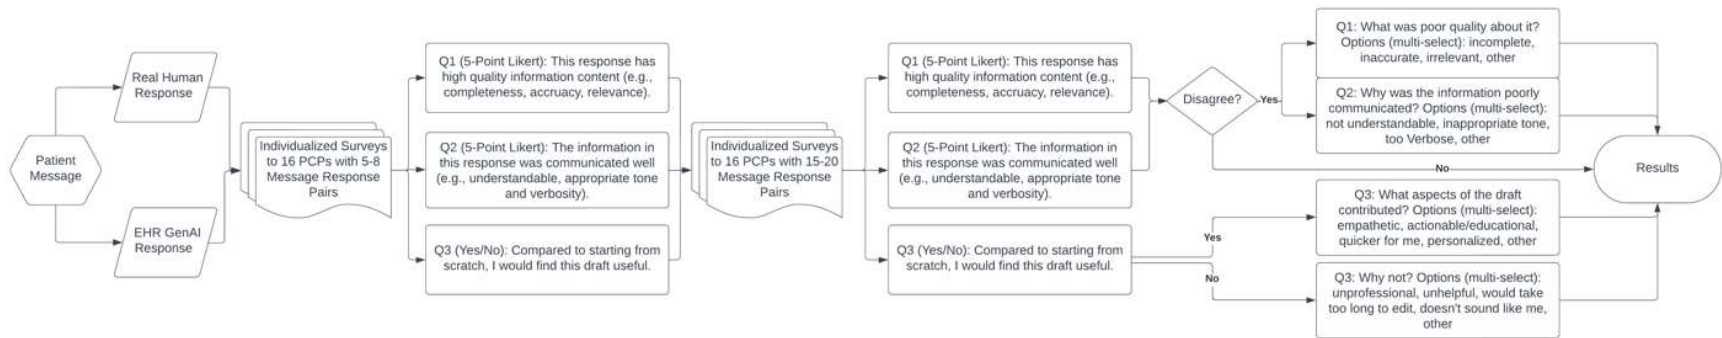

eAppendix 2. Subgroup Analyses Stratified First by HCP Type (Physician vs Nonphysician), Then by Patient Message Subcategory

Superscript indicates group similarity such that X<sup>a</sup> and Y<sup>a</sup> are similar while X<sup>a</sup> and Y<sup>b</sup> are statistically different.

Subgroup Analysis 1: Physicians vs Non-Physicians vs GenAI

| Responder Type | n   | Mean (SD) Information Content Quality (5-point Likert) | p-value | Mean (SD) Communication Quality (5-point Likert) | p-value | Proportion (SD) of Responses Preferred to a Blank Page | p-value |
|----------------|-----|--------------------------------------------------------|---------|--------------------------------------------------|---------|--------------------------------------------------------|---------|
| Physicians     | 38  | 3.37 <sup>a</sup> (1.34)                               | 0.96    | 3.00 <sup>a</sup> (1.21)                         | 0.012   | 0.50 <sup>a</sup> (0.51)                               | 0.18    |
| Non-Physicians | 131 | 3.43 <sup>a</sup> (1.25)                               |         | 3.49 <sup>b</sup> (1.18)                         |         | 0.69 <sup>a</sup> (0.46)                               |         |
| GenAI          | 175 | 3.53 <sup>a</sup> (1.26)                               |         | 3.70 <sup>b</sup> (1.15)                         |         | 0.69 <sup>a</sup> (0.47)                               |         |

Subgroup Analysis 2: Physicians vs Non-Physicians vs GenAI Stratified by Patient Message Category

| Patient Message Type      | Responder Type | n   | Mean (SD) Information Content Quality (5-point Likert) | p-value | Mean (SD) Communication Quality (5-point Likert) | p-value | Proportion (SD) of Responses Preferred to a Blank Page | p-value |
|---------------------------|----------------|-----|--------------------------------------------------------|---------|--------------------------------------------------|---------|--------------------------------------------------------|---------|
| General Medical Advice    | Physicians     | 25  | 3.24 <sup>a</sup> (1.36)                               | 0.90    | 3.08 <sup>a</sup> (1.22)                         | 0.0068  | 0.52 <sup>a</sup> (0.51)                               | 0.23    |
|                           | Non-Physicians | 60  | 3.53 <sup>a</sup> (1.21)                               |         | 3.43 <sup>b</sup> (1.24)                         |         | 0.75 <sup>a</sup> (0.44)                               |         |
|                           | GenAI          | 103 | 3.72 <sup>a</sup> (1.18)                               |         | 4.05 <sup>b</sup> (0.93)                         |         | 0.78 <sup>a</sup> (0.42)                               |         |
| Medication Refill Request | Physicians     | 5   | 3.40 <sup>a</sup> (1.82)                               | 0.99    | 2.20 <sup>a</sup> (1.64)                         | 0.90    | 0.20 <sup>a</sup> (0.45)                               | 0.91    |
|                           | Non-Physicians | 28  | 3.43 <sup>a</sup> (1.35)                               |         | 3.57 <sup>a</sup> (1.14)                         |         | 0.68 <sup>a</sup> (0.48)                               |         |
|                           | GenAI          | 30  | 3.83 <sup>a</sup> (1.15)                               |         | 3.40 <sup>a</sup> (1.40)                         |         | 0.67 <sup>a</sup> (0.48)                               |         |
| Lab Results               | Physicians     | 8   | 3.75 <sup>a</sup> (1.04)                               | 0.33    | 3.25 <sup>a</sup> (0.71)                         | 0.36    | 0.62 <sup>a</sup> (0.52)                               | 0.76    |
|                           | Non-Physicians | 35  | 3.29 <sup>a</sup> (1.25)                               |         | 3.49 <sup>a</sup> (1.15)                         |         | 0.63 <sup>a</sup> (0.49)                               |         |
|                           | GenAI          | 37  | 2.70 <sup>a</sup> (1.20)                               |         | 2.86 <sup>a</sup> (1.03)                         |         | 0.43 <sup>a</sup> (0.50)                               |         |
| Paperwork                 | Physicians     | 0   | N/A                                                    | 0.99    | N/A                                              | 0.98    | N/A                                                    | 0.99    |
|                           | Non-Physicians | 8   | 3.25 <sup>a</sup> (1.39)                               |         | 3.62 <sup>a</sup> (1.19)                         |         | 0.62 <sup>a</sup> (0.52)                               |         |
|                           | GenAI          | 5   | 4.00 <sup>a</sup> (1.73)                               |         | 4.40 <sup>a</sup> (0.55)                         |         | 0.80 <sup>a</sup> (0.45)                               |         |

eAppendix 3. Linear Mixed Models With Random and Fixed Effects to Explore the Extent to Which Reviewer Variance or That Attributed to Patient Message (General Medical Advice, Laboratory Results, Medication Refill Requests, Paperwork) and HCP (Physician, Nonphysician) Subgroups Affected Final Results for the Main 3 Survey Questions

1. Linear mixed model including individual reviewers as random effects

| Information Content                    |                    |            |           |         |
|----------------------------------------|--------------------|------------|-----------|---------|
|                                        | Coefficient (CI)   | Std. Error | Z         | P value |
| HCP                                    | Reference          | Reference  | Reference | -       |
| GenAI                                  | 0.16 (-0.10, 0.41) | 0.13       | 1.2       | 0.23    |
| Communication Style                    |                    |            |           |         |
| HCP                                    | Reference          | Reference  | Reference | -       |
| GenAI                                  | 0.35 (0.13, 0.57)  | 0.11       | 3.1       | 0.0020  |
| Prefer to Blank Page (0 = No, 1 = Yes) |                    |            |           |         |
| HCP                                    | Reference          | Reference  | Reference | -       |
| GenAI                                  | 0.057              | 0.027      | 1.2       | 0.24    |

2. Linear mixed model including individual reviewers as random effects and patient message subcategory as fixed effects

| Information Content                    |                      |            |           |         |
|----------------------------------------|----------------------|------------|-----------|---------|
|                                        | Coefficient (CI)     | Std. Error | Z         | P value |
| HCP                                    | Reference            | Reference  | Reference | -       |
| GenAI                                  | 0.14 (-0.11, 0.39)   | 0.13       | 1.1       | 0.28    |
| General Medical Advice                 | Reference            | Reference  | Reference | -       |
| Lab Results                            | -0.50 (-0.80,-0.19)  | 0.16       | -3.2      | 0.0020  |
| Medication Refill Requests             | -0.010 (-0.34,0.33)  | 0.17       | -0.038    | 0.97    |
| Paperwork                              | -0.10 (-0.76,0.56)   | 0.34       | -0.30     | 0.76    |
| Communication Style                    |                      |            |           |         |
| HCP                                    | Reference            | Reference  | Reference | -       |
| GenAI                                  | 0.33 (0.11, 0.55)    | 0.11       | 3.0       | 0.0030  |
| General Medical Advice                 | Reference            | Reference  | Reference | -       |
| Lab Results                            | -0.40 (-0.67,-0.13)  | 0.14       | -2.9      | 0.0040  |
| Medication Refill Requests             | -0.36 (-0.66,-0.064) | 0.15       | -2.4      | 0.017   |
| Paperwork                              | 0.25 (-0.33,0.83)    | 0.30       | 0.84      | 0.40    |
| Prefer to Blank Page (0 = No, 1 = Yes) |                      |            |           |         |
| HCP                                    | Reference            | Reference  | Reference | -       |
| GenAI                                  | 0.047                | 0.048      | 1.0       | 0.33    |
| General Medical Advice                 | Reference            | Reference  | Reference | -       |
| Lab Results                            | -0.19 (-0.30,-0.070) | 0.060      | -3.1      | 0.0020  |
| Medication Refill Requests             | -0.11 (-0.24,0.019)  | 0.065      | -1.7      | 0.094   |
| Paperwork                              | -0.052 (-0.30,0.20)  | 0.13       | -0.41     | 0.68    |

3. Linear mixed model including individual reviewers as random effects and both patient message and healthcare provider sub-categories as fixed effects

| Information Content                    |                       |            |           |         |
|----------------------------------------|-----------------------|------------|-----------|---------|
|                                        | Coefficient (CI)      | Std. Error | Z         | P value |
| GenAI                                  | Reference             | Reference  | Reference | -       |
| Physician                              | -0.23 (-0.64,0.19)    | 0.21       | -1.1      | 0.28    |
| Non-Physician                          | -0.11 (-0.38,0.16)    | 0.14       | -0.80     | 0.42    |
| General Medical Advice                 | Reference             | Reference  | Reference | -       |
| Lab Results                            | -0.50 (-0.81,-0.19)   | 0.16       | -3.2      | 0.0010  |
| Medication Refill Requests             | -0.015 (-0.36,0.32)   | 0.17       | -0.089    | 0.93    |
| Paperwork                              | -0.12 (-0.79,0.54)    | 0.34       | -0.36     | 0.72    |
| Communication Style                    |                       |            |           |         |
| GenAI                                  | Reference             | Reference  | Reference | -       |
| Physician                              | -0.81 (-1.2,-0.45)    | 0.18       | -4.4      | 0.000   |
| Non-Physician                          | -0.19 (-0.42,0.04)    | 0.12       | -1.6      | 0.11    |
| General Medical Advice                 | Reference             | Reference  | Reference | -       |
| Lab Results                            | -0.43 (-0.70,-0.16)   | 0.14       | -3.2      | 0.0020  |
| Medication Refill Requests             | -0.41 (-0.70,-0.11)   | 0.15       | -2.7      | 0.0060  |
| Paperwork                              | 0.14 (-0.43,0.72)     | 0.29       | 0.49      | 0.62    |
| Prefer to Blank Page (0 = No, 1 = Yes) |                       |            |           |         |
| GenAI                                  | Reference             | Reference  | Reference | -       |
| Physician                              | -0.22 (-0.38, -0.064) | 0.052      | -2.8      | 0.0060  |
| Non-Physician                          | 0.004 (-0.097,0.11)   | 0.052      | 0.082     | 0.935   |
| General Medical Advice                 | Reference             | Reference  | Reference | -       |
| Lab Results                            | -0.20 (-0.31,-0.083)  | 0.060      | -3.1      | 0.0020  |
| Medication Refill Requests             | -0.13 (-0.25,0.0020)  | 0.065      | -1.7      | 0.094   |
| Paperwork                              | -0.090 (-0.34,0.16)   | 0.13       | -0.71     | 0.48    |

eAppendix 4: Select Free-Text Comments From Each Questions When Other Was Chosen in the Branching Logic

|       | Inadequate Information Content                                                                                                                                                                                                                                                                                                                                | Inadequate Communication Style                                                                                                                                                                                                                                                                                                                                                                                             | Unusable Drafts                                                                                                                                                                                                                                                                                                                                                                                                                | Usable Drafts                                                                                                                                                                                                                                                                                                                                                              |
|-------|---------------------------------------------------------------------------------------------------------------------------------------------------------------------------------------------------------------------------------------------------------------------------------------------------------------------------------------------------------------|----------------------------------------------------------------------------------------------------------------------------------------------------------------------------------------------------------------------------------------------------------------------------------------------------------------------------------------------------------------------------------------------------------------------------|--------------------------------------------------------------------------------------------------------------------------------------------------------------------------------------------------------------------------------------------------------------------------------------------------------------------------------------------------------------------------------------------------------------------------------|----------------------------------------------------------------------------------------------------------------------------------------------------------------------------------------------------------------------------------------------------------------------------------------------------------------------------------------------------------------------------|
| HCP   | "Did not address the patient's concern.",<br>'Not helpful and robotic', 'Rude and non-responsive.'                                                                                                                                                                                                                                                            | 'Patient needs a little more feedback, personalization',<br>'What does watch your diet mean- need to provide link to dietary practices',<br>"Doesn't address patient's worry and not clear they needed refills sent."                                                                                                                                                                                                      | "It doesn't reflect my practice. ",<br>'The message should be responded to by the MD rather than telling the patient that the MD will eventually respond. ',<br>'I would worry about this patient'                                                                                                                                                                                                                             | 'Would list which imaging study was ordered for improved clarity.',<br>'Concrete and clear follow up recommendations[JZ6] ',<br>"I thought the person who responded did so politely, but most PCPs probably don't need to see the patient provide a jury duty letter and I don't like bringing my patients in only for that."                                              |
| GenAI | "The patient has raised a concern that merits follow up sooner. It's not appropriate to put that on the patient at this juncture.",<br>'Response not relevant to question, non-human response',<br>'These results should be followed up by the person who ordered the test',<br>'It restates what she already knows that the scripts are wrong in pharmacy. ' | 'Included information about results but the patient did not ask for this information!',<br>"Had the correct information- needs to be seen/evaluated but message was diluted by including information about 'current medication'. ",<br>'It's not clear to me why the provider can't send it. If it's the front desk's responsibility, say that.<br>"Added info that wasn't asked in the question about recent lab tests. " | 'I would not want to provide medical advice without seeing the patient/talking to the patient',<br>'I would feel the need to start from scratch. I am worried about the patient, and the answer seems unrelated to my concern, which is her appropriate diagnosis and treatment. ',<br>'Not the right message. The patient should be told that the context of the illness must be understood before deciding about testing. ', | "Clear a computer wrote this bc patient asking for an appointment and reply doesn't acknowledge that was the original request ",<br>'The message was sent to the provider but it appears that a team member responded; might make that more clear upfront in the message (e.g. I am so-and-so and work with Dr. X...)',<br>'Get the patient in to discuss this in person', |



eAppendix 5. Exploration of Intraclass Correlation by Subgroup

|                            | Information<br>Content Quality | Communication Style | Draft<br>Usability |
|----------------------------|--------------------------------|---------------------|--------------------|
| ICC - Total                | 0.11                           | 0.094               | 0.012              |
| ICC - HCP Responses Only   | 0.236                          | -0.017              | -0.07              |
| ICC - GenAI Responses Only | -0.024                         | 0.12                | 0.12               |
