# Supplementary material for: Large Language Model–Based Responses to Patients’ In-Basket Messages
Source: PubMed Central journal article supplement (PMC11252893; doi:10.1001/jamanetworkopen.2024.22399), 2024-07-16
Supplement: jamanetwopen-e2422399-s002.pdf [file jamanetwopen-e2422399-s002.pdf]

## Data Sharing Statement

Small. Large Language Model–Based Responses to Patients' In Basket Messages. *JAMA Netw Open*. Published July 16, 2024. doi:10.1001/jamanetworkopen.2024.22399

### Data

**Data available:** No
